# Supplementary material for: On the chemistry of activation of a commercial carbon-supported PtRu electrocatalyst for the methanol oxidation reaction
Source: Royal Society of Chemistry journal article supplement (doi:10.1039/c4cc06098a), 2014-01-01
Supplement: c4cc06098a1.pdf [file c4cc06098a1.pdf]

## Electronic Supporting Information

### On the chemistry of activating commercial carbon-supported PtRu electrocatalyst for methanol oxidation reaction

De-Jun Chen,<sup>1,2</sup> Shi-Gang Sun,<sup>2\*</sup> and YuYe J. Tong<sup>1\*</sup>

<sup>1</sup> Department of Chemistry, Georgetown University, 37<sup>th</sup> & O Streets, NW, Washington, DC 20057. Email: yyt@georgetown.edu

<sup>2</sup> Departments of Chemistry and State Key Laboratory for Physical Chemistry of Solid Surfaces, Xiamen University, Xiamen 361005 P R China. Email: sgsun@xmu.edu.cn

#### **Experimental:**

**Chemicals and materials:** All materials used herein were purchased commercially unless specified otherwise. Pt/C (40 wt%) and PtRu/C (60 wt.%, Pt:Ru=1:1) were courtesy of Johnson Matthey). Ru/C (60 wt.%) was purchased from E-TEC. HClO<sub>4</sub> (70%, Cl < 0.1 101 ppm) was from GFS chemicals and MeOH (>99.8%) from Sigma-Alorich, A.C.S. Reagent. They were used as purchased. High-pure Milli-Q H<sub>2</sub>O (18.2MΩ, TOC<2ppb) was used to make all the solutions.

**Electrochemistry and Electrochemical ATR-SEIRAS:** All electrochemical (EC) experiments were carried out in a conventional three-electrode EC-IR cell (Fig. S2) using a CHI-660D potentiostat in 0.1 M HClO<sub>4</sub> + 0.5 MeOH. Large surface-area Pt gauze and Ag/AgCl (3 M) (Bioanalytical) were used as counter and reference electrodes, respectively. While all potentials were measured physically with respect to this Ag/AgCl reference electrode during the experiments, the potentials used in the paper were converted to with respect to reversible hydrogen electrode (RHE). All attenuated-total-reflection surface enhanced infrared adsorption spectroscopy (ATR-SEIRAS) data acquisitions were carried out on a Bruker Vector-22 Fourier transform IR spectrometer equipped with a liquid-nitrogen-cooled mercury–cadmium–telluride (MCT) detector. A home-made EC-IR cell with a triangular Si prism and an optical reflection accessory (incident angle of >60° enabling total attenuation reflection) was used for in situ measurements (Fig. S2). The geometric area, 1.13cm<sup>2</sup>, was limited by the hole of the sealing O-ring. 100 μL of well-sonicated PtRu/C (60wt.%) suspension with a concentration of 1 μg/μL was drop-casted onto the hole area and air-dried. As Au film and carbon support do not have any methanol oxidation activity within the potential range of the experiments, the detected species must come from the used PtRu/C electrocatalyst. Although ATR-SEIRAS is highly sensitive

with the surface adsorbed species due to surface enhancement effect, the two layer structure (Au film+catalyst) with many small pin-holes between NPs created a micro-porous structure that can hold some reactant or product (such as CO<sub>2</sub>) for infrared detection. No Nafion<sup>®</sup> solution was used in order to eliminate all influence by sensitive infrared measurement. The spectral resolution was 4 cm<sup>-1</sup>. The obtained spectra were shown in the absorbance units defined as  $-\log(I/I_0)$  where  $I$  and  $I_0$  are the single-beam spectral intensities at the measuring potential and the reference potential, respectively.

***Catalyst Characterizations:*** The surface morphology and composition of catalysts were examined by field emission scanning electron microscopy (FE-SEM) combined with Oxford EDS (Zeiss SUPRA55-VP, 20 kV, Carl Zeiss Inc., Germany). The crystal structure of catalysts was measured by X-Ray diffractometer (Rigaku, Ultima IV, 40kV, 44mA). The TEM characterization was performed on JEOL JEM-2100 LaB6 transmission electron microscope at 100 kV. The samples were prepared in carbon-coated copper grids (400 meshes, Electron Microscopy Science). The nanoparticle sizes were measured using Image-J program.

***Supporting Figures:***

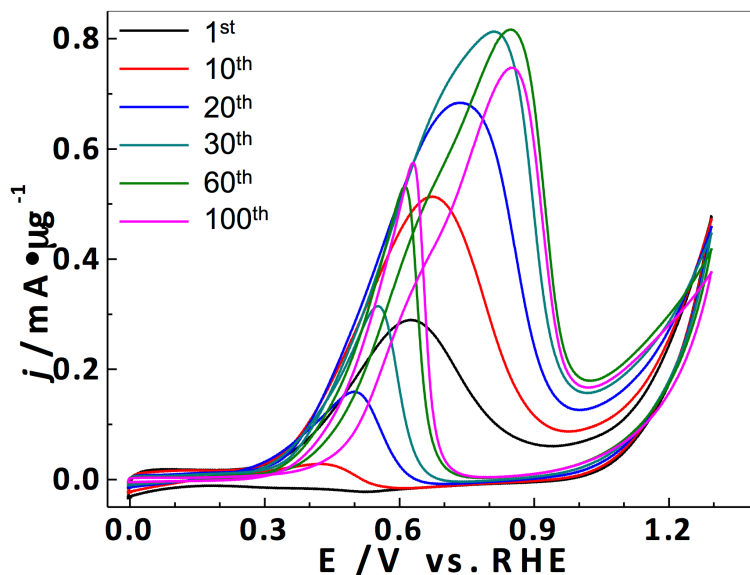

**Fig. S1.** The activating-deactivating CVs for the PtRu/C on a glassy carbon (GC) electrode in 0.1 M HClO<sub>4</sub> + 0.5 M MeOH.

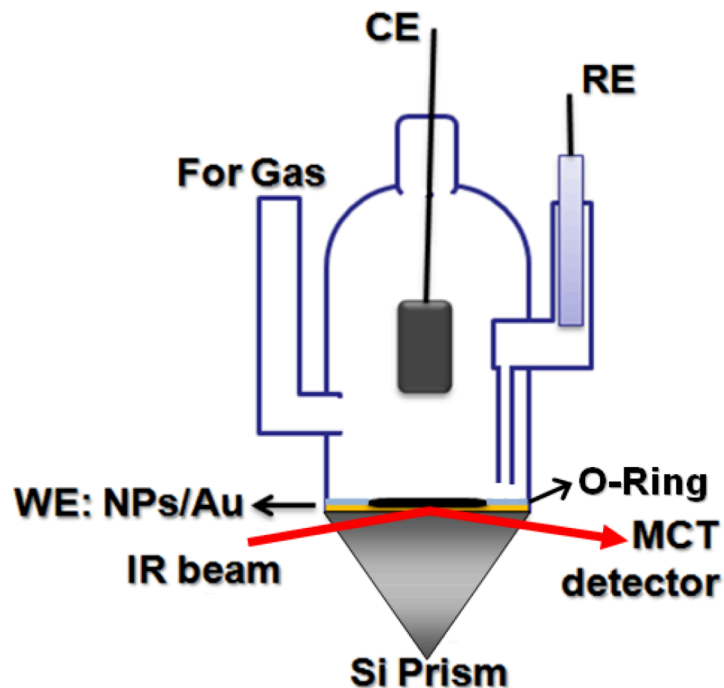

**Fig. S2.** The schematic of the IR cell used in acquiring ATR-SEIRAS spectra

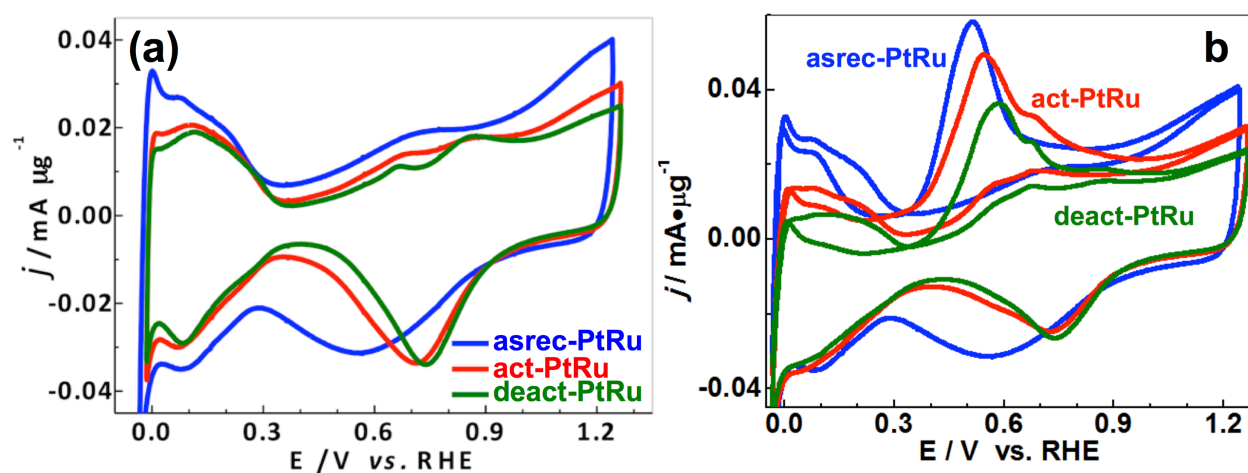

**Fig. S3.** The normal (a) and M-CO<sub>L</sub> (b) stripping CVs of the as-received, the best activated, and the worst deactivated PtRu/C samples in pristine 0.1 M HClO<sub>4</sub> electrolyte. The graduate reduction of the double-layer current is a good indication of less and less surface Ru.

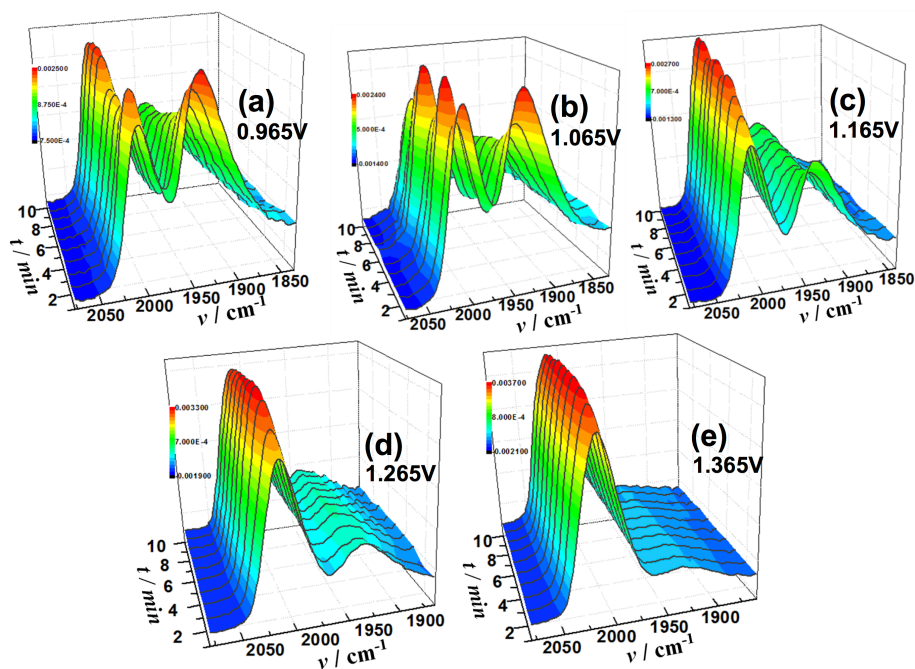

**Fig. S4.** The time-dependent SEIRAS spectra acquired during the SPS with different SP values: (a) 0.965 V, (b) 1.065 V, (c) 1.165 V, (d) 1.265 V, and (e) 1.1365 V.
